# Supplementary material
Source: publisher figshare collection journal article supplement (https://acs.figshare.com/ndownloader/files/5693373)
Supplement: Supplementary file 1 [file 5693373]

data_KFe(CN)3(CO)3 
  
_audit_creation_method            SHELXL-97 
_chemical_name_systematic 	Potassium Irontricyanidetricarbonyl
; 
 ? 
; 
_chemical_name_common             ? 
_chemical_melting_point           ? 
_chemical_formula_moiety          ? 
_chemical_formula_sum 
 'C6 Fe K N3 O3' 
_chemical_formula_weight          257.04 
  
loop_ 
 _atom_type_symbol 
 _atom_type_description 
 _atom_type_scat_dispersion_real 
 _atom_type_scat_dispersion_imag 
 _atom_type_scat_source 
 'C'  'C'   0.0033   0.0016 
 'International Tables Vol C Tables 4.2.6.8 and 6.1.1.4' 
 'N'  'N'   0.0061   0.0033 
 'International Tables Vol C Tables 4.2.6.8 and 6.1.1.4' 
 'O'  'O'   0.0106   0.0060 
 'International Tables Vol C Tables 4.2.6.8 and 6.1.1.4' 
 'K'  'K'   0.2009   0.2494 
 'International Tables Vol C Tables 4.2.6.8 and 6.1.1.4' 
 'Fe'  'Fe'   0.3463   0.8444 
 'International Tables Vol C Tables 4.2.6.8 and 6.1.1.4' 
  
_symmetry_cell_setting            Rhombohedral 
_symmetry_space_group_name_H-M    R-3 
  
loop_ 
 _symmetry_equiv_pos_as_xyz 
 'x, y, z' 
 '-y, x-y, z' 
 '-x+y, -x, z' 
 'x+2/3, y+1/3, z+1/3' 
 '-y+2/3, x-y+1/3, z+1/3' 
 '-x+y+2/3, -x+1/3, z+1/3' 
 'x+1/3, y+2/3, z+2/3' 
 '-y+1/3, x-y+2/3, z+2/3' 
 '-x+y+1/3, -x+2/3, z+2/3' 
 '-x, -y, -z' 
 'y, -x+y, -z' 
 'x-y, x, -z' 
 '-x+2/3, -y+1/3, -z+1/3' 
 'y+2/3, -x+y+1/3, -z+1/3' 
 'x-y+2/3, x+1/3, -z+1/3' 
 '-x+1/3, -y+2/3, -z+2/3' 
 'y+1/3, -x+y+2/3, -z+2/3' 
 'x-y+1/3, x+2/3, -z+2/3' 
  
_cell_length_a                    6.9564(13) 
_cell_length_b                    6.9564(13) 
_cell_length_c                    37.063(10) 
_cell_angle_alpha                 90.00 
_cell_angle_beta                  90.00 
_cell_angle_gamma                 120.00 
_cell_volume                      1553.2(6) 
_cell_formula_units_Z             6 
_cell_measurement_temperature     293(2) 
_cell_measurement_reflns_used     ? 
_cell_measurement_theta_min       ? 
_cell_measurement_theta_max       ? 
  
_exptl_crystal_description        ? 
_exptl_crystal_colour             ? 
_exptl_crystal_size_max           ? 
_exptl_crystal_size_mid           ? 
_exptl_crystal_size_min           ? 
_exptl_crystal_density_meas       ? 
_exptl_crystal_density_diffrn     1.649 
_exptl_crystal_density_method     'not measured' 
_exptl_crystal_F_000              756 
_exptl_absorpt_coefficient_mu     1.841 
_exptl_absorpt_correction_type    none 
_exptl_absorpt_correction_T_min   ? 
_exptl_absorpt_correction_T_max   ? 
_exptl_absorpt_process_details    ? 
  
_exptl_special_details 
; 
 ? 
; 
  
_diffrn_ambient_temperature       293(2) 
_diffrn_radiation_wavelength      0.71073 
_diffrn_radiation_type            MoK\a 
_diffrn_radiation_source          'fine-focus sealed tube' 
_diffrn_radiation_monochromator   graphite 
_diffrn_measurement_device_type   'CCD area detector' 
_diffrn_measurement_method        'phi and omega scans' 
_diffrn_detector_area_resol_mean  ? 
_diffrn_standards_number          ? 
_diffrn_standards_interval_count  ? 
_diffrn_standards_interval_time   ? 
_diffrn_standards_decay_%         ? 
_diffrn_reflns_number             2386 
_diffrn_reflns_av_R_equivalents   0.1112 
_diffrn_reflns_av_sigmaI/netI     0.0559 
_diffrn_reflns_limit_h_min        -7 
_diffrn_reflns_limit_h_max        6 
_diffrn_reflns_limit_k_min        -7 
_diffrn_reflns_limit_k_max        7 
_diffrn_reflns_limit_l_min        -39 
_diffrn_reflns_limit_l_max        41 
_diffrn_reflns_theta_min          1.65 
_diffrn_reflns_theta_max          23.25 
_reflns_number_total              509 
_reflns_number_gt                 443 
_reflns_threshold_expression      >2sigma(I) 
  
_computing_data_collection        'Bruker SMART' 
_computing_cell_refinement        'Bruker SMART' 
_computing_data_reduction         'Bruker SHELXTL' 
_computing_structure_solution     'SHELXS-97 (Sheldrick, 1990)' 
_computing_structure_refinement   'SHELXL-97 (Sheldrick, 1997)' 
_computing_molecular_graphics     'Bruker SHELXTL' 
_computing_publication_material   'Bruker SHELXTL' 
  
_refine_special_details 
; 
 Refinement of F^2^ against ALL reflections.  The weighted R-factor wR and 
 goodness of fit S are based on F^2^, conventional R-factors R are based 
 on F, with F set to zero for negative F^2^. The threshold expression of 
 F^2^ > 2sigma(F^2^) is used only for calculating R-factors(gt) etc. and is 
 not relevant to the choice of reflections for refinement.  R-factors based 
 on F^2^ are statistically about twice as large as those based on F, and R- 
 factors based on ALL data will be even larger. 
; 
  
_refine_ls_structure_factor_coef  Fsqd 
_refine_ls_matrix_type            full 
_refine_ls_weighting_scheme       calc 
_refine_ls_weighting_details 
 'calc w=1/[\s^2^(Fo^2^)+(0.0384P)^2^+0.9348P] where P=(Fo^2^+2Fc^2^)/3' 
_atom_sites_solution_primary      direct 
_atom_sites_solution_secondary    difmap 
_atom_sites_solution_hydrogens    geom 
_refine_ls_hydrogen_treatment     mixed 
_refine_ls_extinction_method      none 
_refine_ls_extinction_coef        ? 
_refine_ls_number_reflns          509 
_refine_ls_number_parameters      43 
_refine_ls_number_restraints      0 
_refine_ls_R_factor_all           0.0367 
_refine_ls_R_factor_gt            0.0328 
_refine_ls_wR_factor_ref          0.0841 
_refine_ls_wR_factor_gt           0.0821 
_refine_ls_goodness_of_fit_ref    1.068 
_refine_ls_restrained_S_all       1.068 
_refine_ls_shift/su_max           0.000 
_refine_ls_shift/su_mean          0.000 
  
loop_ 
 _atom_site_label 
 _atom_site_type_symbol 
 _atom_site_fract_x 
 _atom_site_fract_y 
 _atom_site_fract_z 
 _atom_site_U_iso_or_equiv 
 _atom_site_adp_type 
 _atom_site_occupancy 
 _atom_site_symmetry_multiplicity 
 _atom_site_calc_flag 
 _atom_site_refinement_flags 
 _atom_site_disorder_assembly 
 _atom_site_disorder_group 
N1 N 0.3515(5) 0.9979(5) 0.04544(9) 0.0714(8) Uani 1 1 d . . . 
O1 O -0.0098(5) 0.6268(5) 0.13419(7) 0.0972(10) Uani 1 1 d . . . 
Fe1 Fe 0.0000 1.0000 0.094710(16) 0.0434(3) Uani 1 3 d S . . 
K1 K 0.6667 1.3333 0.00035(3) 0.0565(4) Uani 1 3 d S . . 
C1 C 0.2199(5) 0.9982(5) 0.06341(8) 0.0495(8) Uani 1 1 d . . . 
C2 C -0.0040(6) 0.7723(6) 0.11996(8) 0.0617(9) Uani 1 1 d . . . 
  
loop_ 
 _atom_site_aniso_label 
 _atom_site_aniso_U_11 
 _atom_site_aniso_U_22 
 _atom_site_aniso_U_33 
 _atom_site_aniso_U_23 
 _atom_site_aniso_U_13 
 _atom_site_aniso_U_12 
N1 0.0683(19) 0.074(2) 0.0750(19) -0.0006(16) 0.0168(17) 0.0375(17) 
O1 0.138(3) 0.0878(19) 0.0737(18) 0.0260(15) -0.0041(17) 0.0628(19) 
Fe1 0.0496(4) 0.0496(4) 0.0308(4) 0.000 0.000 0.02482(19) 
K1 0.0588(5) 0.0588(5) 0.0520(7) 0.000 0.000 0.0294(3) 
C1 0.0495(18) 0.0504(18) 0.0466(16) -0.0014(14) 0.0023(14) 0.0235(15) 
C2 0.073(2) 0.072(2) 0.0396(17) 0.0052(16) 0.0008(15) 0.0365(19) 
  
_geom_special_details 
; 
 All esds (except the esd in the dihedral angle between two l.s. planes) 
 are estimated using the full covariance matrix.  The cell esds are taken 
 into account individually in the estimation of esds in distances, angles 
 and torsion angles; correlations between esds in cell parameters are only 
 used when they are defined by crystal symmetry.  An approximate (isotropic) 
 treatment of cell esds is used for estimating esds involving l.s. planes. 
; 
  
loop_ 
 _geom_bond_atom_site_label_1 
 _geom_bond_atom_site_label_2 
 _geom_bond_distance 
 _geom_bond_site_symmetry_2 
 _geom_bond_publ_flag 
N1 C1 1.133(4) . ? 
N1 K1 2.813(3) 10_675 ? 
N1 K1 2.816(3) . ? 
O1 C2 1.124(4) . ? 
Fe1 C2 1.828(4) 2_675 ? 
Fe1 C2 1.828(4) . ? 
Fe1 C2 1.828(4) 3_465 ? 
Fe1 C1 1.925(3) 3_465 ? 
Fe1 C1 1.925(3) 2_675 ? 
Fe1 C1 1.925(3) . ? 
K1 N1 2.813(3) 10_675 ? 
K1 N1 2.813(3) 11_565 ? 
K1 N1 2.813(3) 12_665 ? 
K1 N1 2.816(3) 2_775 ? 
K1 N1 2.816(3) 3_575 ? 
K1 K1 4.0164(7) 10_675 ? 
K1 K1 4.0164(7) 10_785 ? 
K1 K1 4.0164(7) 10_685 ? 
  
loop_ 
 _geom_angle_atom_site_label_1 
 _geom_angle_atom_site_label_2 
 _geom_angle_atom_site_label_3 
 _geom_angle 
 _geom_angle_site_symmetry_1 
 _geom_angle_site_symmetry_3 
 _geom_angle_publ_flag 
C1 N1 K1 130.6(2) . 10_675 ? 
C1 N1 K1 130.0(2) . . ? 
K1 N1 K1 91.05(9) 10_675 . ? 
C2 Fe1 C2 96.12(13) 2_675 . ? 
C2 Fe1 C2 96.12(13) 2_675 3_465 ? 
C2 Fe1 C2 96.12(13) . 3_465 ? 
C2 Fe1 C1 173.73(13) 2_675 3_465 ? 
C2 Fe1 C1 87.75(14) . 3_465 ? 
C2 Fe1 C1 88.34(13) 3_465 3_465 ? 
C2 Fe1 C1 88.34(13) 2_675 2_675 ? 
C2 Fe1 C1 173.73(13) . 2_675 ? 
C2 Fe1 C1 87.75(13) 3_465 2_675 ? 
C1 Fe1 C1 87.43(13) 3_465 2_675 ? 
C2 Fe1 C1 87.75(14) 2_675 . ? 
C2 Fe1 C1 88.34(13) . . ? 
C2 Fe1 C1 173.73(13) 3_465 . ? 
C1 Fe1 C1 87.43(13) 3_465 . ? 
C1 Fe1 C1 87.43(13) 2_675 . ? 
N1 K1 N1 87.37(10) 10_675 11_565 ? 
N1 K1 N1 87.37(10) 10_675 12_665 ? 
N1 K1 N1 87.37(10) 11_565 12_665 ? 
N1 K1 N1 95.50(13) 10_675 2_775 ? 
N1 K1 N1 88.95(9) 11_565 2_775 ? 
N1 K1 N1 175.23(11) 12_665 2_775 ? 
N1 K1 N1 88.95(9) 10_675 . ? 
N1 K1 N1 175.23(11) 11_565 . ? 
N1 K1 N1 95.50(13) 12_665 . ? 
N1 K1 N1 88.37(10) 2_775 . ? 
N1 K1 N1 175.23(11) 10_675 3_575 ? 
N1 K1 N1 95.50(13) 11_565 3_575 ? 
N1 K1 N1 88.95(9) 12_665 3_575 ? 
N1 K1 N1 88.37(10) 2_775 3_575 ? 
N1 K1 N1 88.37(10) . 3_575 ? 
N1 K1 K1 44.50(6) 10_675 10_675 ? 
N1 K1 K1 131.80(8) 11_565 10_675 ? 
N1 K1 K1 92.01(7) 12_665 10_675 ? 
N1 K1 K1 92.71(6) 2_775 10_675 ? 
N1 K1 K1 44.45(6) . 10_675 ? 
N1 K1 K1 132.69(8) 3_575 10_675 ? 
N1 K1 K1 92.01(6) 10_675 10_785 ? 
N1 K1 K1 44.50(6) 11_565 10_785 ? 
N1 K1 K1 131.80(8) 12_665 10_785 ? 
N1 K1 K1 44.45(6) 2_775 10_785 ? 
N1 K1 K1 132.69(8) . 10_785 ? 
N1 K1 K1 92.71(6) 3_575 10_785 ? 
K1 K1 K1 119.996(1) 10_675 10_785 ? 
N1 K1 K1 131.80(8) 10_675 10_685 ? 
N1 K1 K1 92.01(6) 11_565 10_685 ? 
N1 K1 K1 44.50(6) 12_665 10_685 ? 
N1 K1 K1 132.69(8) 2_775 10_685 ? 
N1 K1 K1 92.71(6) . 10_685 ? 
N1 K1 K1 44.45(6) 3_575 10_685 ? 
K1 K1 K1 119.996(1) 10_675 10_685 ? 
K1 K1 K1 119.996(1) 10_785 10_685 ? 
N1 C1 Fe1 178.9(3) . . ? 
O1 C2 Fe1 177.0(3) . . ? 
  
_diffrn_measured_fraction_theta_max    1.000 
_diffrn_reflns_theta_full              23.25 
_diffrn_measured_fraction_theta_full   1.000 
_refine_diff_density_max    0.269 
_refine_diff_density_min   -0.283 
_refine_diff_density_rms    0.065 
#===END

data_Ph4AsFe(CN)3(CO)3 
  
_audit_creation_method            SHELXL-97 
_chemical_name_systematic 	 Tetraphenylarsonium Irontricyanidetricarbonyl
; 
 ? 
; 
_chemical_name_common             ? 
_chemical_melting_point           ? 
_chemical_formula_moiety          ? 
_chemical_formula_sum 
 'C30 H22 As Fe N3 O4' 
_chemical_formula_weight          619.28 
  
loop_ 
 _atom_type_symbol 
 _atom_type_description 
 _atom_type_scat_dispersion_real 
 _atom_type_scat_dispersion_imag 
 _atom_type_scat_source 
 'C'  'C'   0.0033   0.0016 
 'International Tables Vol C Tables 4.2.6.8 and 6.1.1.4' 
 'H'  'H'   0.0000   0.0000 
 'International Tables Vol C Tables 4.2.6.8 and 6.1.1.4' 
 'N'  'N'   0.0061   0.0033 
 'International Tables Vol C Tables 4.2.6.8 and 6.1.1.4' 
 'O'  'O'   0.0106   0.0060 
 'International Tables Vol C Tables 4.2.6.8 and 6.1.1.4' 
 'Fe'  'Fe'   0.3463   0.8444 
 'International Tables Vol C Tables 4.2.6.8 and 6.1.1.4' 
 'As'  'As'   0.0499   2.0058 
 'International Tables Vol C Tables 4.2.6.8 and 6.1.1.4' 
  
_symmetry_cell_setting            Triclinic 
_symmetry_space_group_name_H-M    P-1 
  
loop_ 
 _symmetry_equiv_pos_as_xyz 
 'x, y, z' 
 '-x, -y, -z' 
  
_cell_length_a                    9.1789(10) 
_cell_length_b                    12.6561(14) 
_cell_length_c                    13.9666(15) 
_cell_angle_alpha                 116.693(2) 
_cell_angle_beta                  102.184(2) 
_cell_angle_gamma                 90.213(2) 
_cell_volume                      1407.9(3) 
_cell_formula_units_Z             2 
_cell_measurement_temperature     293(2) 
_cell_measurement_reflns_used     ? 
_cell_measurement_theta_min       ? 
_cell_measurement_theta_max       ? 
  
_exptl_crystal_description        ? 
_exptl_crystal_colour             ? 
_exptl_crystal_size_max           ? 
_exptl_crystal_size_mid           ? 
_exptl_crystal_size_min           ? 
_exptl_crystal_density_meas       ? 
_exptl_crystal_density_diffrn     1.461 
_exptl_crystal_density_method     'not measured' 
_exptl_crystal_F_000              628 
_exptl_absorpt_coefficient_mu     1.741 
_exptl_absorpt_correction_type    empirical 
_exptl_absorpt_correction_T_min   0.6837 
_exptl_absorpt_correction_T_max   0.8249 
_exptl_absorpt_process_details    ? 
  
_exptl_special_details 
; 
 ? 
; 
  
_diffrn_ambient_temperature       293(2) 
_diffrn_radiation_wavelength      0.71073 
_diffrn_radiation_type            MoK\a 
_diffrn_radiation_source          'fine-focus sealed tube' 
_diffrn_radiation_monochromator   graphite 
_diffrn_measurement_device_type   'CCD area detector' 
_diffrn_measurement_method        'phi and omega scans' 
_diffrn_detector_area_resol_mean  ? 
_diffrn_standards_number          ? 
_diffrn_standards_interval_count  ? 
_diffrn_standards_interval_time   ? 
_diffrn_standards_decay_%         ? 
_diffrn_reflns_number             6502 
_diffrn_reflns_av_R_equivalents   0.0560 
_diffrn_reflns_av_sigmaI/netI     0.0783 
_diffrn_reflns_limit_h_min        -10 
_diffrn_reflns_limit_h_max        10 
_diffrn_reflns_limit_k_min        -14 
_diffrn_reflns_limit_k_max        10 
_diffrn_reflns_limit_l_min        -12 
_diffrn_reflns_limit_l_max        15 
_diffrn_reflns_theta_min          1.68 
_diffrn_reflns_theta_max          23.28 
_reflns_number_total              4047 
_reflns_number_gt                 2633 
_reflns_threshold_expression      >2sigma(I) 
  
_computing_data_collection        'Bruker SMART' 
_computing_cell_refinement        'Bruker SMART' 
_computing_data_reduction         'Bruker SHELXTL' 
_computing_structure_solution     'SHELXS-97 (Sheldrick, 1990)' 
_computing_structure_refinement   'SHELXL-97 (Sheldrick, 1997)' 
_computing_molecular_graphics     'Bruker SHELXTL' 
_computing_publication_material   'Bruker SHELXTL' 
  
_refine_special_details 
; 
 Refinement of F^2^ against ALL reflections.  The weighted R-factor wR and 
 goodness of fit S are based on F^2^, conventional R-factors R are based 
 on F, with F set to zero for negative F^2^. The threshold expression of 
 F^2^ > 2sigma(F^2^) is used only for calculating R-factors(gt) etc. and is 
 not relevant to the choice of reflections for refinement.  R-factors based 
 on F^2^ are statistically about twice as large as those based on F, and R- 
 factors based on ALL data will be even larger. 
; 
  
_refine_ls_structure_factor_coef  Fsqd 
_refine_ls_matrix_type            full 
_refine_ls_weighting_scheme       calc 
_refine_ls_weighting_details 
 'calc w=1/[\s^2^(Fo^2^)+(0.0921P)^2^+0.0000P] where P=(Fo^2^+2Fc^2^)/3' 
_atom_sites_solution_primary      direct 
_atom_sites_solution_secondary    difmap 
_atom_sites_solution_hydrogens    geom 
_refine_ls_hydrogen_treatment     mixed 
_refine_ls_extinction_method      none 
_refine_ls_extinction_coef        ? 
_refine_ls_number_reflns          4047 
_refine_ls_number_parameters      360 
_refine_ls_number_restraints      0 
_refine_ls_R_factor_all           0.0835 
_refine_ls_R_factor_gt            0.0511 
_refine_ls_wR_factor_ref          0.1657 
_refine_ls_wR_factor_gt           0.1305 
_refine_ls_goodness_of_fit_ref    1.027 
_refine_ls_restrained_S_all       1.027 
_refine_ls_shift/su_max           0.153 
_refine_ls_shift/su_mean          0.026 
  
loop_ 
 _atom_site_label 
 _atom_site_type_symbol 
 _atom_site_fract_x 
 _atom_site_fract_y 
 _atom_site_fract_z 
 _atom_site_U_iso_or_equiv 
 _atom_site_adp_type 
 _atom_site_occupancy 
 _atom_site_symmetry_multiplicity 
 _atom_site_calc_flag 
 _atom_site_refinement_flags 
 _atom_site_disorder_assembly 
 _atom_site_disorder_group 
As1 As 0.68165(7) 0.63708(5) 0.36048(5) 0.0449(3) Uani 1 1 d . . . 
C30 C 0.4669(7) 0.7891(6) 0.4479(6) 0.0530(17) Uani 1 1 d . . . 
H30 H 0.3979 0.7377 0.3834 0.064 Uiso 1 1 calc R . . 
C13 C 0.5199(6) 0.5514(5) 0.2375(5) 0.0434(15) Uani 1 1 d . . . 
C16 C 0.2903(8) 0.4224(7) 0.0527(5) 0.062(2) Uani 1 1 d . . . 
H16 H 0.2123 0.3798 -0.0090 0.074 Uiso 1 1 calc R . . 
C7 C 0.8399(6) 0.6685(5) 0.3046(5) 0.0422(15) Uani 1 1 d . . . 
C19 C 0.7430(7) 0.5384(6) 0.4289(5) 0.0470(16) Uani 1 1 d . . . 
C18 C 0.4528(7) 0.4432(6) 0.2194(6) 0.0562(18) Uani 1 1 d . . . 
H18 H 0.4837 0.4136 0.2696 0.067 Uiso 1 1 calc R . . 
C12 C 0.8848(7) 0.5763(6) 0.2234(5) 0.0555(18) Uani 1 1 d . . . 
H12 H 0.8353 0.5003 0.1947 0.067 Uiso 1 1 calc R . . 
C20 C 0.8111(8) 0.4387(6) 0.3764(5) 0.0574(18) Uani 1 1 d . . . 
H20 H 0.8281 0.4191 0.3074 0.069 Uiso 1 1 calc R . . 
C14 C 0.4709(7) 0.5947(6) 0.1609(5) 0.0561(18) Uani 1 1 d . . . 
H14 H 0.5151 0.6665 0.1714 0.067 Uiso 1 1 calc R . . 
C8 C 0.9171(8) 0.7813(6) 0.3509(6) 0.0590(19) Uani 1 1 d . . . 
H8 H 0.8891 0.8448 0.4084 0.071 Uiso 1 1 calc R . . 
C11 C 1.0018(8) 0.5924(8) 0.1825(6) 0.070(2) Uani 1 1 d . . . 
H11 H 1.0289 0.5294 0.1241 0.084 Uiso 1 1 calc R . . 
C10 C 1.0796(8) 0.7071(8) 0.2317(6) 0.073(2) Uani 1 1 d . . . 
H10 H 1.1630 0.7194 0.2084 0.087 Uiso 1 1 calc R . . 
C17 C 0.3376(8) 0.3794(6) 0.1242(6) 0.068(2) Uani 1 1 d . . . 
H17 H 0.2935 0.3062 0.1108 0.081 Uiso 1 1 calc R . . 
C15 C 0.3561(8) 0.5287(7) 0.0698(5) 0.063(2) Uani 1 1 d . . . 
H15 H 0.3226 0.5569 0.0188 0.076 Uiso 1 1 calc R . . 
C25 C 0.6184(7) 0.7758(5) 0.4644(5) 0.0474(16) Uani 1 1 d . . . 
C27 C 0.6750(10) 0.9485(6) 0.6441(6) 0.069(2) Uani 1 1 d . . . 
H27 H 0.7445 1.0021 0.7072 0.083 Uiso 1 1 calc R . . 
C22 C 0.8296(9) 0.3990(7) 0.5305(7) 0.073(2) Uani 1 1 d . . . 
H22 H 0.8566 0.3497 0.5631 0.088 Uiso 1 1 calc R . . 
C21 C 0.8542(9) 0.3679(6) 0.4267(7) 0.069(2) Uani 1 1 d . . . 
H21 H 0.8994 0.2998 0.3914 0.083 Uiso 1 1 calc R . . 
C9 C 1.0352(8) 0.7984(7) 0.3111(7) 0.071(2) Uani 1 1 d . . . 
H9 H 1.0845 0.8745 0.3399 0.085 Uiso 1 1 calc R . . 
C26 C 0.7229(8) 0.8553(6) 0.5634(6) 0.0623(19) Uani 1 1 d . . . 
H26 H 0.8240 0.8439 0.5732 0.075 Uiso 1 1 calc R . . 
C24 C 0.7217(9) 0.5701(7) 0.5345(7) 0.074(2) Uani 1 1 d . . . 
H24 H 0.6772 0.6384 0.5704 0.089 Uiso 1 1 calc R . . 
C23 C 0.7673(10) 0.4992(9) 0.5857(8) 0.090(3) Uani 1 1 d . . . 
H23 H 0.7552 0.5201 0.6563 0.109 Uiso 1 1 calc R . . 
C28 C 0.5257(11) 0.9636(7) 0.6328(6) 0.074(2) Uani 1 1 d . . . 
H28 H 0.4928 1.0248 0.6891 0.089 Uiso 1 1 calc R . . 
C29 C 0.4230(9) 0.8853(7) 0.5348(7) 0.079(2) Uani 1 1 d . . . 
H29 H 0.3221 0.8972 0.5267 0.095 Uiso 1 1 calc R . . 
Fe1 Fe 0.79735(10) 0.02384(8) 0.13268(7) 0.0499(3) Uani 1 1 d . . . 
O2 O 0.5776(6) 0.1923(5) 0.2082(5) 0.0883(18) Uani 1 1 d . . . 
O1 O 1.0462(6) 0.2069(5) 0.1967(4) 0.0814(16) Uani 1 1 d . . . 
N1 N 0.8969(7) 0.0603(5) 0.3681(5) 0.0664(17) Uani 1 1 d . . . 
N2 N 1.0148(7) -0.1638(6) 0.0592(5) 0.0717(18) Uani 1 1 d . . . 
O3 O 0.7075(6) -0.0314(5) -0.0992(5) 0.0792(16) Uani 1 1 d . . . 
C4 C 0.8600(8) 0.0445(6) 0.2820(6) 0.0506(17) Uani 1 1 d . . . 
N3 N 0.5451(7) -0.1669(5) 0.0861(5) 0.0734(18) Uani 1 1 d . . . 
C5 C 0.9333(8) -0.0957(6) 0.0881(5) 0.0517(17) Uani 1 1 d . . . 
C3 C 0.7416(8) -0.0078(6) -0.0103(6) 0.0586(19) Uani 1 1 d . . . 
C6 C 0.6423(8) -0.0989(6) 0.1023(5) 0.0547(18) Uani 1 1 d . . . 
C2 C 0.6635(8) 0.1288(6) 0.1774(6) 0.067(2) Uani 1 1 d . . . 
C1 C 0.9493(8) 0.1382(6) 0.1699(5) 0.0568(18) Uani 1 1 d . . . 
O4 O 0.2444(8) 0.7168(5) 0.9396(5) 0.0790(17) Uani 1 1 d . . . 
H1 H 0.170(10) 0.746(8) 0.986(7) 0.12(4) Uiso 1 1 d . . . 
H2 H 0.321(8) 0.747(6) 0.984(6) 0.06(3) Uiso 1 1 d . . . 
  
loop_ 
 _atom_site_aniso_label 
 _atom_site_aniso_U_11 
 _atom_site_aniso_U_22 
 _atom_site_aniso_U_33 
 _atom_site_aniso_U_23 
 _atom_site_aniso_U_13 
 _atom_site_aniso_U_12 
As1 0.0456(4) 0.0424(4) 0.0442(4) 0.0187(3) 0.0086(3) 0.0032(3) 
C30 0.053(4) 0.061(4) 0.062(4) 0.036(4) 0.029(3) 0.022(3) 
C13 0.040(3) 0.040(4) 0.045(4) 0.014(3) 0.015(3) 0.004(3) 
C16 0.056(4) 0.070(5) 0.036(4) 0.010(4) -0.004(3) 0.008(4) 
C7 0.043(4) 0.044(4) 0.040(3) 0.020(3) 0.011(3) 0.010(3) 
C19 0.045(4) 0.048(4) 0.052(4) 0.028(3) 0.009(3) 0.000(3) 
C18 0.053(4) 0.045(4) 0.067(5) 0.022(4) 0.013(4) 0.007(3) 
C12 0.057(4) 0.057(5) 0.053(4) 0.027(4) 0.011(3) 0.007(3) 
C20 0.081(5) 0.044(4) 0.044(4) 0.019(3) 0.010(4) 0.006(4) 
C14 0.059(4) 0.057(4) 0.053(4) 0.027(4) 0.012(4) 0.007(4) 
C8 0.062(5) 0.045(4) 0.078(5) 0.033(4) 0.023(4) 0.012(4) 
C11 0.060(5) 0.081(6) 0.086(6) 0.044(5) 0.035(4) 0.028(4) 
C10 0.053(5) 0.116(8) 0.083(6) 0.071(6) 0.024(4) 0.022(5) 
C17 0.058(5) 0.045(4) 0.074(5) 0.008(4) 0.008(4) -0.001(4) 
C15 0.064(5) 0.085(6) 0.031(4) 0.023(4) 0.002(3) 0.016(4) 
C25 0.055(4) 0.044(4) 0.046(4) 0.021(3) 0.016(3) 0.002(3) 
C27 0.093(6) 0.054(5) 0.044(4) 0.008(4) 0.021(4) -0.009(4) 
C22 0.067(5) 0.076(6) 0.095(7) 0.062(5) 0.001(5) -0.003(4) 
C21 0.076(5) 0.048(5) 0.077(6) 0.029(4) 0.005(4) 0.007(4) 
C9 0.064(5) 0.071(6) 0.093(6) 0.047(5) 0.028(5) 0.000(4) 
C26 0.060(4) 0.060(5) 0.062(5) 0.023(4) 0.016(4) -0.001(4) 
C24 0.076(5) 0.087(6) 0.084(6) 0.053(5) 0.035(5) 0.028(5) 
C23 0.101(7) 0.116(8) 0.113(7) 0.089(7) 0.058(6) 0.044(6) 
C28 0.107(7) 0.060(5) 0.053(5) 0.019(4) 0.033(5) 0.010(5) 
C29 0.072(5) 0.081(6) 0.106(7) 0.050(5) 0.044(5) 0.030(5) 
Fe1 0.0481(6) 0.0431(6) 0.0517(6) 0.0182(5) 0.0071(5) 0.0008(4) 
O2 0.065(4) 0.054(3) 0.126(5) 0.029(3) 0.013(3) 0.015(3) 
O1 0.076(4) 0.074(4) 0.081(4) 0.031(3) 0.003(3) -0.023(3) 
N1 0.070(4) 0.066(4) 0.057(4) 0.023(3) 0.018(3) 0.014(3) 
N2 0.072(4) 0.075(5) 0.071(4) 0.031(4) 0.028(4) 0.020(4) 
O3 0.080(4) 0.089(4) 0.059(3) 0.033(3) -0.001(3) -0.009(3) 
C4 0.056(4) 0.044(4) 0.040(4) 0.011(3) 0.010(3) 0.002(3) 
N3 0.068(4) 0.060(4) 0.076(4) 0.017(3) 0.018(3) -0.009(3) 
C5 0.054(4) 0.054(5) 0.046(4) 0.023(3) 0.013(3) 0.001(4) 
C3 0.059(4) 0.057(5) 0.050(5) 0.022(4) 0.000(4) -0.006(4) 
C6 0.053(4) 0.047(4) 0.051(4) 0.012(3) 0.013(3) 0.006(4) 
C2 0.053(5) 0.046(5) 0.087(6) 0.027(4) -0.002(4) -0.003(4) 
C1 0.061(5) 0.052(4) 0.054(4) 0.024(4) 0.009(4) 0.003(4) 
O4 0.078(4) 0.063(4) 0.075(4) 0.015(3) 0.016(4) 0.005(3) 
  
_geom_special_details 
; 
 All esds (except the esd in the dihedral angle between two l.s. planes) 
 are estimated using the full covariance matrix.  The cell esds are taken 
 into account individually in the estimation of esds in distances, angles 
 and torsion angles; correlations between esds in cell parameters are only 
 used when they are defined by crystal symmetry.  An approximate (isotropic) 
 treatment of cell esds is used for estimating esds involving l.s. planes. 
; 
  
loop_ 
 _geom_bond_atom_site_label_1 
 _geom_bond_atom_site_label_2 
 _geom_bond_distance 
 _geom_bond_site_symmetry_2 
 _geom_bond_publ_flag 
As1 C13 1.889(6) . ? 
As1 C25 1.897(6) . ? 
As1 C7 1.906(6) . ? 
As1 C19 1.909(6) . ? 
C30 C25 1.384(9) . ? 
C30 C29 1.415(9) . ? 
C13 C18 1.392(8) . ? 
C13 C14 1.404(9) . ? 
C16 C17 1.338(10) . ? 
C16 C15 1.370(10) . ? 
C7 C12 1.353(8) . ? 
C7 C8 1.388(9) . ? 
C19 C20 1.374(9) . ? 
C19 C24 1.402(9) . ? 
C18 C17 1.405(9) . ? 
C12 C11 1.372(9) . ? 
C20 C21 1.380(10) . ? 
C14 C15 1.378(9) . ? 
C8 C9 1.375(9) . ? 
C11 C10 1.407(10) . ? 
C10 C9 1.333(10) . ? 
C25 C26 1.424(9) . ? 
C27 C26 1.370(9) . ? 
C27 C28 1.371(11) . ? 
C22 C23 1.358(11) . ? 
C22 C21 1.391(10) . ? 
C24 C23 1.395(10) . ? 
C28 C29 1.405(11) . ? 
Fe1 C2 1.804(8) . ? 
Fe1 C3 1.805(8) . ? 
Fe1 C1 1.820(8) . ? 
Fe1 C5 1.931(8) . ? 
Fe1 C6 1.938(8) . ? 
Fe1 C4 1.937(7) . ? 
O2 C2 1.135(8) . ? 
O1 C1 1.118(8) . ? 
N1 C4 1.101(8) . ? 
N2 C5 1.133(8) . ? 
O3 C3 1.109(7) . ? 
N3 C6 1.149(8) . ? 
  
loop_ 
 _geom_angle_atom_site_label_1 
 _geom_angle_atom_site_label_2 
 _geom_angle_atom_site_label_3 
 _geom_angle 
 _geom_angle_site_symmetry_1 
 _geom_angle_site_symmetry_3 
 _geom_angle_publ_flag 
C13 As1 C25 109.9(3) . . ? 
C13 As1 C7 106.6(2) . . ? 
C25 As1 C7 114.0(3) . . ? 
C13 As1 C19 108.2(3) . . ? 
C25 As1 C19 108.3(3) . . ? 
C7 As1 C19 109.7(3) . . ? 
C25 C30 C29 116.1(7) . . ? 
C18 C13 C14 119.5(6) . . ? 
C18 C13 As1 120.6(5) . . ? 
C14 C13 As1 119.8(5) . . ? 
C17 C16 C15 120.4(7) . . ? 
C12 C7 C8 119.6(6) . . ? 
C12 C7 As1 118.6(5) . . ? 
C8 C7 As1 121.6(5) . . ? 
C20 C19 C24 120.2(6) . . ? 
C20 C19 As1 120.3(5) . . ? 
C24 C19 As1 119.4(5) . . ? 
C13 C18 C17 119.0(7) . . ? 
C7 C12 C11 121.4(7) . . ? 
C19 C20 C21 119.7(7) . . ? 
C15 C14 C13 118.8(7) . . ? 
C9 C8 C7 119.4(7) . . ? 
C12 C11 C10 117.9(7) . . ? 
C9 C10 C11 120.8(7) . . ? 
C16 C17 C18 120.9(7) . . ? 
C16 C15 C14 121.4(7) . . ? 
C30 C25 C26 121.4(6) . . ? 
C30 C25 As1 118.4(5) . . ? 
C26 C25 As1 119.7(5) . . ? 
C26 C27 C28 120.6(7) . . ? 
C23 C22 C21 121.9(7) . . ? 
C20 C21 C22 119.6(7) . . ? 
C10 C9 C8 120.7(7) . . ? 
C27 C26 C25 120.1(7) . . ? 
C23 C24 C19 119.9(7) . . ? 
C22 C23 C24 118.7(8) . . ? 
C27 C28 C29 119.1(7) . . ? 
C28 C29 C30 122.6(7) . . ? 
C2 Fe1 C3 95.2(3) . . ? 
C2 Fe1 C1 94.1(3) . . ? 
C3 Fe1 C1 95.1(3) . . ? 
C2 Fe1 C5 175.8(3) . . ? 
C3 Fe1 C5 86.7(3) . . ? 
C1 Fe1 C5 89.5(3) . . ? 
C2 Fe1 C6 86.9(3) . . ? 
C3 Fe1 C6 88.8(3) . . ? 
C1 Fe1 C6 175.9(3) . . ? 
C5 Fe1 C6 89.4(3) . . ? 
C2 Fe1 C4 88.5(3) . . ? 
C3 Fe1 C4 175.4(3) . . ? 
C1 Fe1 C4 87.3(3) . . ? 
C5 Fe1 C4 89.4(3) . . ? 
C6 Fe1 C4 88.8(3) . . ? 
N1 C4 Fe1 177.5(6) . . ? 
N2 C5 Fe1 177.0(6) . . ? 
O3 C3 Fe1 177.5(7) . . ? 
N3 C6 Fe1 176.2(6) . . ? 
O2 C2 Fe1 176.9(8) . . ? 
O1 C1 Fe1 176.6(7) . . ? 
  
_diffrn_measured_fraction_theta_max    0.997 
_diffrn_reflns_theta_full              23.28 
_diffrn_measured_fraction_theta_full   0.997 
_refine_diff_density_max    0.923 
_refine_diff_density_min   -0.350 
_refine_diff_density_rms    0.102 
#===END 
 
data_cisPh4PEt4NFe(CN)4(CO)2 
  
_audit_creation_method            SHELXL-97 
_chemical_name_systematic         tetraphenylphosphoniumtetraethylammonium cis-Irontetracyanidedicarbonyl
; 
 ? 
; 
_chemical_name_common             ? 
_chemical_melting_point           ? 
_chemical_formula_moiety          ? 
_chemical_formula_sum 
 'C38 H40 Fe N5 O2 P' 
_chemical_formula_weight          685.57 
  
loop_ 
 _atom_type_symbol 
 _atom_type_description 
 _atom_type_scat_dispersion_real 
 _atom_type_scat_dispersion_imag 
 _atom_type_scat_source 
 'C'  'C'   0.0033   0.0016 
 'International Tables Vol C Tables 4.2.6.8 and 6.1.1.4' 
 'H'  'H'   0.0000   0.0000 
 'International Tables Vol C Tables 4.2.6.8 and 6.1.1.4' 
 'N'  'N'   0.0061   0.0033 
 'International Tables Vol C Tables 4.2.6.8 and 6.1.1.4' 
 'O'  'O'   0.0106   0.0060 
 'International Tables Vol C Tables 4.2.6.8 and 6.1.1.4' 
 'P'  'P'   0.1023   0.0942 
 'International Tables Vol C Tables 4.2.6.8 and 6.1.1.4' 
 'Fe'  'Fe'   0.3463   0.8444 
 'International Tables Vol C Tables 4.2.6.8 and 6.1.1.4' 
  
_symmetry_cell_setting            Monoclinic 
_symmetry_space_group_name_H-M    C2/c 
  
loop_ 
 _symmetry_equiv_pos_as_xyz 
 'x, y, z' 
 '-x, y, -z+1/2' 
 'x+1/2, y+1/2, z' 
 '-x+1/2, y+1/2, -z+1/2' 
 '-x, -y, -z' 
 'x, -y, z-1/2' 
 '-x+1/2, -y+1/2, -z' 
 'x+1/2, -y+1/2, z-1/2' 
  
_cell_length_a                    11.476(2) 
_cell_length_b                    29.561(6) 
_cell_length_c                    11.246(2) 
_cell_angle_alpha                 90.00 
_cell_angle_beta                  109.23(3) 
_cell_angle_gamma                 90.00 
_cell_volume                      3602.2(12) 
_cell_formula_units_Z             4 
_cell_measurement_temperature     293(2) 
_cell_measurement_reflns_used     ? 
_cell_measurement_theta_min       ? 
_cell_measurement_theta_max       ? 
  
_exptl_crystal_description        ? 
_exptl_crystal_colour             ? 
_exptl_crystal_size_max           ? 
_exptl_crystal_size_mid           ? 
_exptl_crystal_size_min           ? 
_exptl_crystal_density_meas       ? 
_exptl_crystal_density_diffrn     1.264 
_exptl_crystal_density_method     'not measured' 
_exptl_crystal_F_000              1440 
_exptl_absorpt_coefficient_mu     0.502 
_exptl_absorpt_correction_type    none 
_exptl_absorpt_correction_T_min   ? 
_exptl_absorpt_correction_T_max   ? 
_exptl_absorpt_process_details    ? 
  
_exptl_special_details 
; 
 ? 
; 
  
_diffrn_ambient_temperature       293(2) 
_diffrn_radiation_wavelength      0.71073 
_diffrn_radiation_type            MoK\a 
_diffrn_radiation_source          'fine-focus sealed tube' 
_diffrn_radiation_monochromator   graphite 
_diffrn_measurement_device_type   'Bruker P4' 
_diffrn_measurement_method        '\w scans' 
_diffrn_detector_area_resol_mean  ? 
_diffrn_standards_number          ? 
_diffrn_standards_interval_count  ? 
_diffrn_standards_interval_time   ? 
_diffrn_standards_decay_%         ? 
_diffrn_reflns_number             8231 
_diffrn_reflns_av_R_equivalents   0.0686 
_diffrn_reflns_av_sigmaI/netI     0.0698 
_diffrn_reflns_limit_h_min        -12 
_diffrn_reflns_limit_h_max        12 
_diffrn_reflns_limit_k_min        -31 
_diffrn_reflns_limit_k_max        32 
_diffrn_reflns_limit_l_min        -12 
_diffrn_reflns_limit_l_max        12 
_diffrn_reflns_theta_min          1.38 
_diffrn_reflns_theta_max          23.31 
_reflns_number_total              2609 
_reflns_number_gt                 1528 
_reflns_threshold_expression      >2sigma(I) 
  
_computing_data_collection        'Bruker XSCANS' 
_computing_cell_refinement        'Bruker XSCANS' 
_computing_data_reduction         'Bruker SHELXTL' 
_computing_structure_solution     'SHELXS-97 (Sheldrick, 1990)' 
_computing_structure_refinement   'SHELXL-97 (Sheldrick, 1997)' 
_computing_molecular_graphics     'Bruker SHELXTL' 
_computing_publication_material   'Bruker SHELXTL' 
  
_refine_special_details 
; 
 Refinement of F^2^ against ALL reflections.  The weighted R-factor wR and 
 goodness of fit S are based on F^2^, conventional R-factors R are based 
 on F, with F set to zero for negative F^2^. The threshold expression of 
 F^2^ > 2sigma(F^2^) is used only for calculating R-factors(gt) etc. and is 
 not relevant to the choice of reflections for refinement.  R-factors based 
 on F^2^ are statistically about twice as large as those based on F, and R- 
 factors based on ALL data will be even larger. 
; 
  
_refine_ls_structure_factor_coef  Fsqd 
_refine_ls_matrix_type            full 
_refine_ls_weighting_scheme       calc 
_refine_ls_weighting_details 
 'calc w=1/[\s^2^(Fo^2^)+(0.1166P)^2^+0.0000P] where P=(Fo^2^+2Fc^2^)/3' 
_atom_sites_solution_primary      direct 
_atom_sites_solution_secondary    difmap 
_atom_sites_solution_hydrogens    geom 
_refine_ls_hydrogen_treatment     mixed 
_refine_ls_extinction_method      none 
_refine_ls_extinction_coef        ? 
_refine_ls_number_reflns          2609 
_refine_ls_number_parameters      237 
_refine_ls_number_restraints      0 
_refine_ls_R_factor_all           0.0971 
_refine_ls_R_factor_gt            0.0589 
_refine_ls_wR_factor_ref          0.1906 
_refine_ls_wR_factor_gt           0.1605 
_refine_ls_goodness_of_fit_ref    0.948 
_refine_ls_restrained_S_all       0.948 
_refine_ls_shift/su_max           0.000 
_refine_ls_shift/su_mean          0.000 
  
loop_ 
 _atom_site_label 
 _atom_site_type_symbol 
 _atom_site_fract_x 
 _atom_site_fract_y 
 _atom_site_fract_z 
 _atom_site_U_iso_or_equiv 
 _atom_site_adp_type 
 _atom_site_occupancy 
 _atom_site_symmetry_multiplicity 
 _atom_site_calc_flag 
 _atom_site_refinement_flags 
 _atom_site_disorder_assembly 
 _atom_site_disorder_group 
Fe1 Fe 0.0000 0.18521(3) 0.2500 0.0522(4) Uani 1 2 d S . . 
P1 P 1.0000 0.45641(5) 0.2500 0.0444(5) Uani 1 2 d S . . 
N1 N 1.0000 0.17780(19) 0.7500 0.0666(17) Uani 1 2 d S . . 
O1 O -0.1124(5) 0.25367(15) 0.0622(5) 0.1089(15) Uani 1 1 d . . . 
C9 C 0.9258(5) 0.38772(16) 0.0764(5) 0.0585(13) Uani 1 1 d . . . 
H9 H 0.8609 0.3841 0.1079 0.070 Uiso 1 1 calc R . . 
N3 N -0.1140(4) 0.11257(16) 0.0518(4) 0.0700(13) Uani 1 1 d . . . 
C3 C -0.0721(4) 0.13894(16) 0.1258(5) 0.0503(12) Uani 1 1 d . . . 
C1 C -0.0687(5) 0.22634(18) 0.1354(6) 0.0662(15) Uani 1 1 d . . . 
C2 C 0.1473(5) 0.18356(17) 0.1997(5) 0.0611(14) Uani 1 1 d . . . 
C10 C 0.8664(4) 0.49145(14) 0.1964(4) 0.0452(11) Uani 1 1 d . . . 
N2 N 0.2319(5) 0.18262(17) 0.1714(5) 0.0905(16) Uani 1 1 d . . . 
C4 C 1.0139(4) 0.42093(14) 0.1266(4) 0.0468(12) Uani 1 1 d . . . 
C8 C 0.9334(6) 0.36029(18) -0.0188(5) 0.0724(16) Uani 1 1 d . . . 
H8 H 0.8731 0.3386 -0.0532 0.087 Uiso 1 1 calc R . . 
C7 C 1.0294(7) 0.3650(2) -0.0624(5) 0.0795(18) Uani 1 1 d . . . 
H7 H 1.0350 0.3462 -0.1264 0.095 Uiso 1 1 calc R . . 
C11 C 0.7715(5) 0.48224(16) 0.0866(5) 0.0609(14) Uani 1 1 d . . . 
H11 H 0.7780 0.4584 0.0353 0.073 Uiso 1 1 calc R . . 
C5 C 1.1110(5) 0.42515(17) 0.0805(5) 0.0600(14) Uani 1 1 d . . . 
H5 H 1.1716 0.4469 0.1133 0.072 Uiso 1 1 calc R . . 
C12 C 0.6660(5) 0.50895(19) 0.0532(6) 0.0744(16) Uani 1 1 d . . . 
H12 H 0.6027 0.5032 -0.0218 0.089 Uiso 1 1 calc R . . 
C14 C 0.7491(5) 0.55368(17) 0.2394(6) 0.0687(15) Uani 1 1 d . . . 
H14 H 0.7413 0.5773 0.2908 0.082 Uiso 1 1 calc R . . 
C15 C 0.8556(5) 0.52801(15) 0.2716(5) 0.0578(13) Uani 1 1 d . . . 
H15 H 0.9208 0.5351 0.3440 0.069 Uiso 1 1 calc R . . 
C22 C 0.7792(7) 0.1820(2) 0.7570(7) 0.107(2) Uani 1 1 d . . . 
C13 C 0.6539(5) 0.54366(19) 0.1293(6) 0.0744(17) Uani 1 1 d . . . 
H13 H 0.5815 0.5606 0.1069 0.089 Uiso 1 1 calc R . . 
C6 C 1.1175(6) 0.3968(2) -0.0146(5) 0.0758(17) Uani 1 1 d . . . 
H6 H 1.1827 0.3996 -0.0460 0.091 Uiso 1 1 calc R . . 
C17 C 1.0455(13) 0.2034(4) 0.8838(10) 0.078(3) Uani 0.50 1 d P . . 
C18 C 0.9262(16) 0.1898(4) 0.8281(14) 0.094(4) Uani 0.50 1 d P . . 
C16 C 1.1350(12) 0.1894(4) 0.8218(12) 0.087(4) Uani 0.50 1 d P . . 
C20 C 1.0381(14) 0.2548(4) 0.8699(15) 0.103(5) Uani 0.50 1 d P . . 
C19 C 1.0187(15) 0.1269(4) 0.8029(11) 0.086(5) Uani 0.50 1 d P . . 
C21 C 1.0000 0.0937(5) 0.7500 0.308(17) Uani 1 2 d S . . 
  
loop_ 
 _atom_site_aniso_label 
 _atom_site_aniso_U_11 
 _atom_site_aniso_U_22 
 _atom_site_aniso_U_33 
 _atom_site_aniso_U_23 
 _atom_site_aniso_U_13 
 _atom_site_aniso_U_12 
Fe1 0.0521(7) 0.0554(7) 0.0522(7) 0.000 0.0213(5) 0.000 
P1 0.0403(10) 0.0468(10) 0.0484(11) 0.000 0.0179(8) 0.000 
N1 0.077(5) 0.071(4) 0.060(4) 0.000 0.034(4) 0.000 
O1 0.119(4) 0.098(3) 0.105(4) 0.032(3) 0.030(3) 0.028(3) 
C9 0.062(3) 0.057(3) 0.061(3) -0.004(3) 0.026(3) 0.000(3) 
N3 0.063(3) 0.079(3) 0.067(3) -0.007(3) 0.021(2) -0.003(3) 
C3 0.047(3) 0.058(3) 0.052(3) 0.003(3) 0.025(3) 0.003(3) 
C1 0.065(4) 0.062(3) 0.069(4) 0.008(3) 0.019(3) 0.015(3) 
C2 0.058(3) 0.070(3) 0.054(3) 0.004(3) 0.016(3) 0.002(3) 
C10 0.042(3) 0.044(3) 0.051(3) 0.002(2) 0.018(2) 0.004(2) 
N2 0.071(4) 0.120(4) 0.092(4) 0.018(3) 0.043(3) 0.006(3) 
C4 0.047(3) 0.048(3) 0.050(3) 0.002(2) 0.022(2) 0.004(2) 
C8 0.081(4) 0.063(3) 0.071(4) -0.011(3) 0.022(3) 0.000(3) 
C7 0.111(5) 0.072(4) 0.061(4) -0.009(3) 0.036(4) 0.012(4) 
C11 0.048(3) 0.059(3) 0.073(4) -0.007(3) 0.017(3) 0.004(3) 
C5 0.062(3) 0.064(3) 0.058(3) 0.003(3) 0.025(3) 0.006(3) 
C12 0.050(3) 0.082(4) 0.083(4) -0.007(3) 0.010(3) 0.001(3) 
C14 0.075(4) 0.060(3) 0.082(4) -0.007(3) 0.040(4) 0.015(3) 
C15 0.061(3) 0.054(3) 0.057(3) -0.002(2) 0.016(3) 0.003(3) 
C22 0.085(5) 0.135(6) 0.119(6) -0.014(5) 0.060(5) -0.013(4) 
C13 0.050(4) 0.071(4) 0.101(5) 0.009(4) 0.024(4) 0.013(3) 
C6 0.090(5) 0.090(4) 0.066(4) 0.006(3) 0.050(4) 0.017(4) 
C17 0.089(9) 0.098(9) 0.051(7) -0.021(6) 0.028(7) -0.038(8) 
C18 0.133(14) 0.081(8) 0.103(11) -0.005(8) 0.086(11) -0.010(9) 
C16 0.061(8) 0.113(10) 0.082(9) -0.004(7) 0.017(7) 0.006(7) 
C20 0.128(12) 0.054(7) 0.152(13) -0.030(8) 0.079(11) -0.014(7) 
C19 0.109(12) 0.061(6) 0.114(12) -0.032(6) 0.073(12) -0.019(8) 
C21 0.23(2) 0.080(9) 0.73(5) 0.000 0.31(3) 0.000 
  
_geom_special_details 
; 
 All esds (except the esd in the dihedral angle between two l.s. planes) 
 are estimated using the full covariance matrix.  The cell esds are taken 
 into account individually in the estimation of esds in distances, angles 
 and torsion angles; correlations between esds in cell parameters are only 
 used when they are defined by crystal symmetry.  An approximate (isotropic) 
 treatment of cell esds is used for estimating esds involving l.s. planes. 
; 
  
loop_ 
 _geom_bond_atom_site_label_1 
 _geom_bond_atom_site_label_2 
 _geom_bond_distance 
 _geom_bond_site_symmetry_2 
 _geom_bond_publ_flag 
Fe1 C1 1.758(6) . ? 
Fe1 C1 1.758(6) 2 ? 
Fe1 C3 1.935(5) 2 ? 
Fe1 C3 1.935(5) . ? 
Fe1 C2 1.952(6) 2 ? 
Fe1 C2 1.952(6) . ? 
P1 C10 1.782(4) 2_755 ? 
P1 C10 1.782(4) . ? 
P1 C4 1.788(4) . ? 
P1 C4 1.788(4) 2_755 ? 
N1 C18 1.450(12) . ? 
N1 C18 1.450(12) 2_756 ? 
N1 C16 1.531(13) . ? 
N1 C16 1.531(13) 2_756 ? 
N1 C19 1.607(12) 2_756 ? 
N1 C19 1.607(12) . ? 
N1 C17 1.610(11) . ? 
N1 C17 1.610(11) 2_756 ? 
O1 C1 1.145(6) . ? 
C9 C8 1.369(7) . ? 
C9 C4 1.389(6) . ? 
N3 C3 1.126(6) . ? 
C2 N2 1.117(7) . ? 
C10 C11 1.378(6) . ? 
C10 C15 1.403(6) . ? 
C4 C5 1.381(6) . ? 
C8 C7 1.353(8) . ? 
C7 C6 1.355(8) . ? 
C11 C12 1.390(7) . ? 
C5 C6 1.379(7) . ? 
C12 C13 1.372(7) . ? 
C14 C15 1.382(7) . ? 
C14 C13 1.386(7) . ? 
C22 C16 1.542(14) 2_756 ? 
C22 C18 1.628(19) . ? 
C17 C18 1.365(18) . ? 
C17 C16 1.479(17) . ? 
C17 C20 1.526(16) . ? 
C18 C16 1.598(19) 2_756 ? 
C16 C22 1.542(14) 2_756 ? 
C16 C18 1.598(19) 2_756 ? 
C19 C19 1.12(2) 2_756 ? 
C19 C21 1.132(12) . ? 
C21 C19 1.132(12) 2_756 ? 
  
loop_ 
 _geom_angle_atom_site_label_1 
 _geom_angle_atom_site_label_2 
 _geom_angle_atom_site_label_3 
 _geom_angle 
 _geom_angle_site_symmetry_1 
 _geom_angle_site_symmetry_3 
 _geom_angle_publ_flag 
C1 Fe1 C1 92.5(4) . 2 ? 
C1 Fe1 C3 178.5(2) . 2 ? 
C1 Fe1 C3 88.7(2) 2 2 ? 
C1 Fe1 C3 88.7(2) . . ? 
C1 Fe1 C3 178.5(2) 2 . ? 
C3 Fe1 C3 90.0(3) 2 . ? 
C1 Fe1 C2 90.5(2) . 2 ? 
C1 Fe1 C2 91.5(2) 2 2 ? 
C3 Fe1 C2 88.7(2) 2 2 ? 
C3 Fe1 C2 89.2(2) . 2 ? 
C1 Fe1 C2 91.5(2) . . ? 
C1 Fe1 C2 90.5(2) 2 . ? 
C3 Fe1 C2 89.2(2) 2 . ? 
C3 Fe1 C2 88.7(2) . . ? 
C2 Fe1 C2 177.1(3) 2 . ? 
C10 P1 C10 108.9(3) 2_755 . ? 
C10 P1 C4 108.5(2) 2_755 . ? 
C10 P1 C4 111.4(2) . . ? 
C10 P1 C4 111.4(2) 2_755 2_755 ? 
C10 P1 C4 108.5(2) . 2_755 ? 
C4 P1 C4 108.2(3) . 2_755 ? 
C18 N1 C18 151.8(11) . 2_756 ? 
C18 N1 C16 108.5(8) . . ? 
C18 N1 C16 64.7(8) 2_756 . ? 
C18 N1 C16 64.7(8) . 2_756 ? 
C18 N1 C16 108.5(8) 2_756 2_756 ? 
C16 N1 C16 154.2(10) . 2_756 ? 
C18 N1 C19 114.8(7) . 2_756 ? 
C18 N1 C19 92.1(7) 2_756 2_756 ? 
C16 N1 C19 113.1(8) . 2_756 ? 
C16 N1 C19 91.4(8) 2_756 2_756 ? 
C18 N1 C19 92.1(7) . . ? 
C18 N1 C19 114.8(7) 2_756 . ? 
C16 N1 C19 91.4(8) . . ? 
C16 N1 C19 113.1(8) 2_756 . ? 
C19 N1 C19 41.0(8) 2_756 . ? 
C18 N1 C17 52.7(7) . . ? 
C18 N1 C17 112.2(7) 2_756 . ? 
C16 N1 C17 56.1(7) . . ? 
C16 N1 C17 110.4(7) 2_756 . ? 
C19 N1 C17 138.5(7) 2_756 . ? 
C19 N1 C17 97.6(6) . . ? 
C18 N1 C17 112.2(7) . 2_756 ? 
C18 N1 C17 52.7(7) 2_756 2_756 ? 
C16 N1 C17 110.4(7) . 2_756 ? 
C16 N1 C17 56.1(7) 2_756 2_756 ? 
C19 N1 C17 97.5(6) 2_756 2_756 ? 
C19 N1 C17 138.5(7) . 2_756 ? 
C17 N1 C17 123.9(10) . 2_756 ? 
C8 C9 C4 120.7(5) . . ? 
N3 C3 Fe1 178.7(5) . . ? 
O1 C1 Fe1 178.8(6) . . ? 
N2 C2 Fe1 179.7(6) . . ? 
C11 C10 C15 119.4(4) . . ? 
C11 C10 P1 121.7(3) . . ? 
C15 C10 P1 118.8(4) . . ? 
C5 C4 C9 118.8(4) . . ? 
C5 C4 P1 121.8(4) . . ? 
C9 C4 P1 119.4(3) . . ? 
C7 C8 C9 119.5(5) . . ? 
C8 C7 C6 121.2(5) . . ? 
C10 C11 C12 119.4(5) . . ? 
C6 C5 C4 119.5(5) . . ? 
C13 C12 C11 121.0(5) . . ? 
C15 C14 C13 119.0(5) . . ? 
C14 C15 C10 120.8(5) . . ? 
C16 C22 C18 60.5(7) 2_756 . ? 
C12 C13 C14 120.3(5) . . ? 
C7 C6 C5 120.3(5) . . ? 
C18 C17 C16 116.6(10) . . ? 
C18 C17 C20 103.5(13) . . ? 
C16 C17 C20 104.8(10) . . ? 
C18 C17 N1 57.6(6) . . ? 
C16 C17 N1 59.2(6) . . ? 
C20 C17 N1 112.5(10) . . ? 
C17 C18 N1 69.7(8) . . ? 
C17 C18 C16 120.8(10) . 2_756 ? 
N1 C18 C16 60.1(7) . 2_756 ? 
C17 C18 C22 170.9(12) . . ? 
N1 C18 C22 112.7(10) . . ? 
C16 C18 C22 57.1(8) 2_756 . ? 
C17 C16 N1 64.7(7) . . ? 
C17 C16 C22 170.2(11) . 2_756 ? 
N1 C16 C22 113.1(9) . 2_756 ? 
C17 C16 C18 111.3(10) . 2_756 ? 
N1 C16 C18 55.2(7) . 2_756 ? 
C22 C16 C18 62.4(8) 2_756 2_756 ? 
C19 C19 C21 60.2(7) 2_756 . ? 
C19 C19 N1 69.5(4) 2_756 . ? 
C21 C19 N1 129.7(10) . . ? 
C19 C21 C19 59.6(13) . 2_756 ? 
  
_diffrn_measured_fraction_theta_max    0.998 
_diffrn_reflns_theta_full              23.31 
_diffrn_measured_fraction_theta_full   0.998 
_refine_diff_density_max    0.421 
_refine_diff_density_min   -0.267 
_refine_diff_density_rms    0.075 
#===END  
